# Supplementary material for: Enhanced skin penetration of curcumin by a nanoemulsion-embedded oligopeptide hydrogel for psoriasis topical therapy
Source: Royal Society of Chemistry journal article supplement (doi:10.1039/d4md00781f), 2025-01-01
Supplement: d4md00781f1.pdf [file d4md00781f1.pdf]

## **Supporting Information**

### **Enhanced skin penetration of curcumin by nanoemulsion-embedded oligopeptide hydrogel for psoriasis topical therapy**

Kehan Chen, Hui Yang, Guo Xu, Yunhan Hu, Xue Tian, Song Qin\*, and Tianyue Jiang\*

School of Pharmaceutical Sciences, Nanjing Tech University, Nanjing 211816, China

Email : qinsong@njtech.edu.cn (Song Qin), tjiang@njtech.edu.cn (Tianyue Jiang)

**Supplementary information**

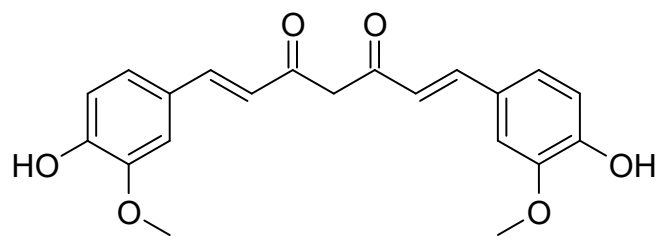

Molecular structure of curcumin

**Supplementary Tables:**

Tab. S1. Primer sequences used in quantitative real-time PCR

| Primer        |   | Base Sequence          | Primer length(bp) |
|---------------|---|------------------------|-------------------|
| GAPDH         | F | GGGCTCTCTGCTCCTCCCTGT  | 21                |
|               | R | CGGCCAAATCCGTTACACCG   | 21                |
| TNF- $\alpha$ | F | GCCCACGTCGTAGCAAACCAC  | 21                |
|               | R | GCAGGGGCTCTTGACGGCAG   | 20                |
| IL-6          | F | CCTCTCTGCAAGAGACTTCCAT | 22                |
|               | R | AGTCTCCTCTCCGGACTTGT   | 20                |
| IL-23         | F | TCCTCCAGCCAGAGGATCACCC | 22                |
|               | R | AGAGTTGCTGTCCGTG GG C  | 20                |

**Supplementary Figures:**

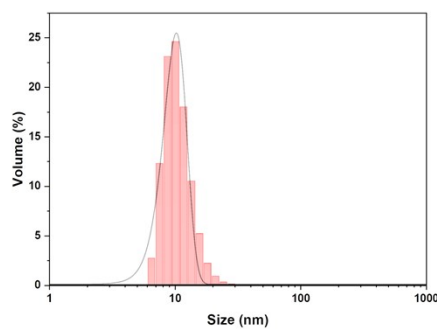

Fig. S1. Particle sizes of Cur-NEs

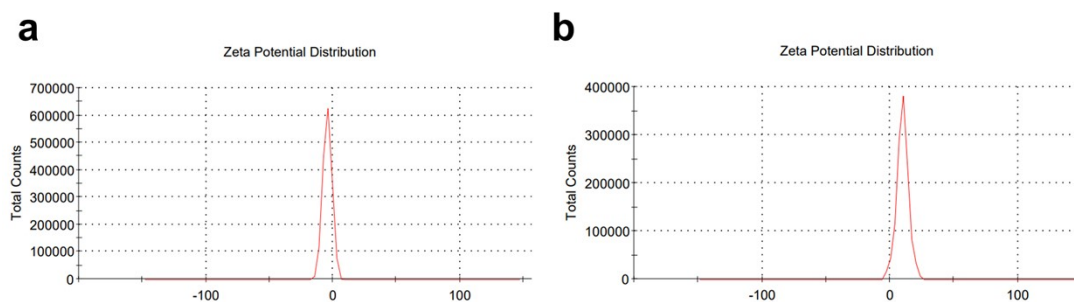

Fig. S2. Zeta potential of Cur-NEs (a) and Cur-CNEs (b).

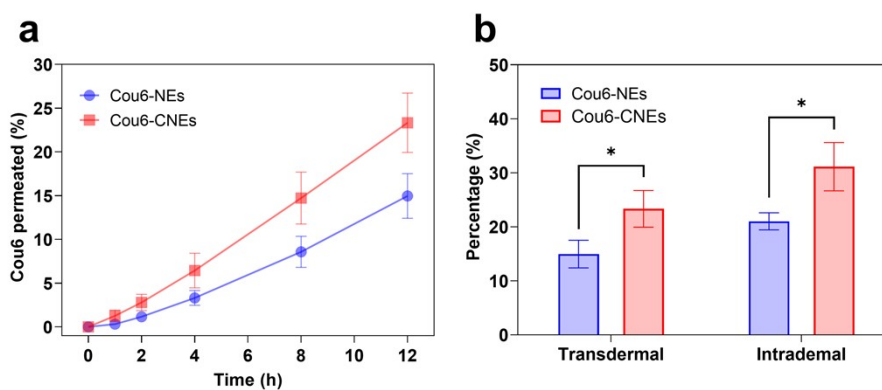

Fig. S3. (a) Comparison of cumulative amounts of Cou6-NEs and Cou6-CNEs in the skin over time (b) Comparison of transdermal permeation and intradermal retention amounts of Cou6-NEs and Cou6-CNEs at 12 h. \* $p < 0.05$ .

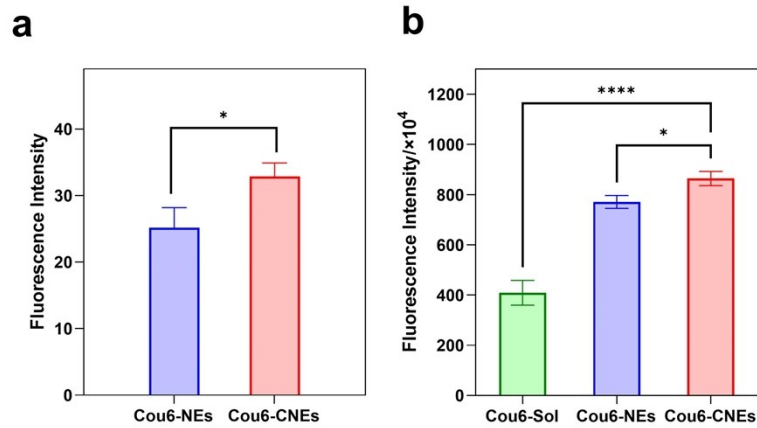

Fig. S4. Fluorescence intensity of Cou6 in HaCaT cells treated with various formulations measured by ImageJ (a) or flow cytometry (b). \* $p < 0.05$ , \*\*\*\* $p < 0.0001$ .

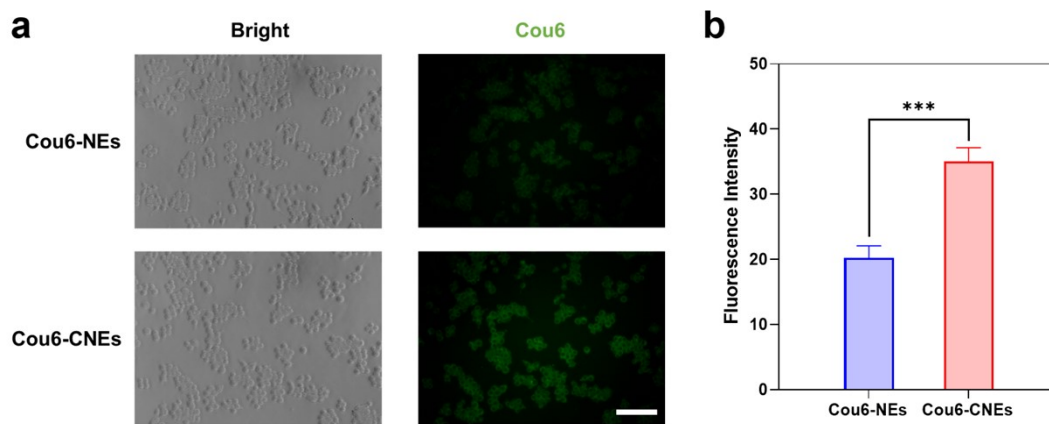

Fig. S5. (a) Intracellular uptake of Cou6-loaded nanoemulsions by RAW264.7 cells after coculture for 2 h. Scale bar: 100  $\mu\text{m}$ . (b) Fluorescence intensity of Cou6 in RAW264.7 cells treated with various formulations measured by ImageJ software.

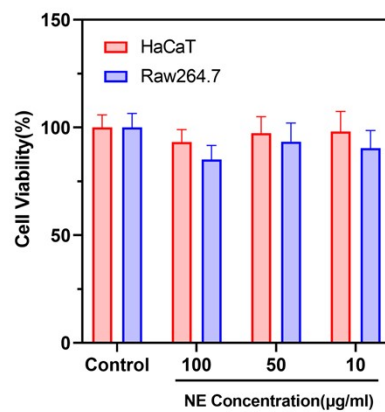

Fig. S6. Safety experiment of blank nanoemulsions on HaCaT and RAW246.7 cells.

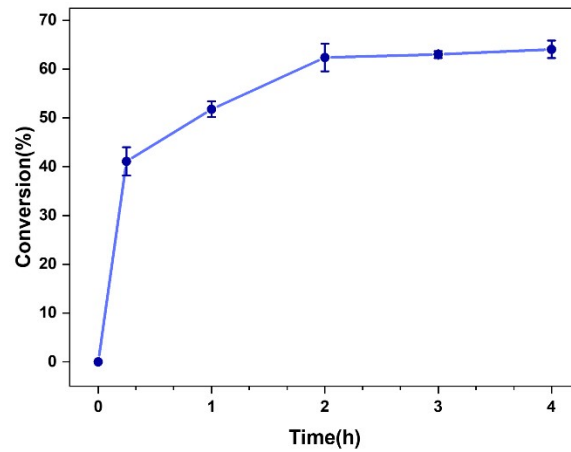

Fig. S7. Average conversion percentage of precursors (Fmoc-F, F-F) to the post-enzymatic products (Fmoc-FFF) over time.

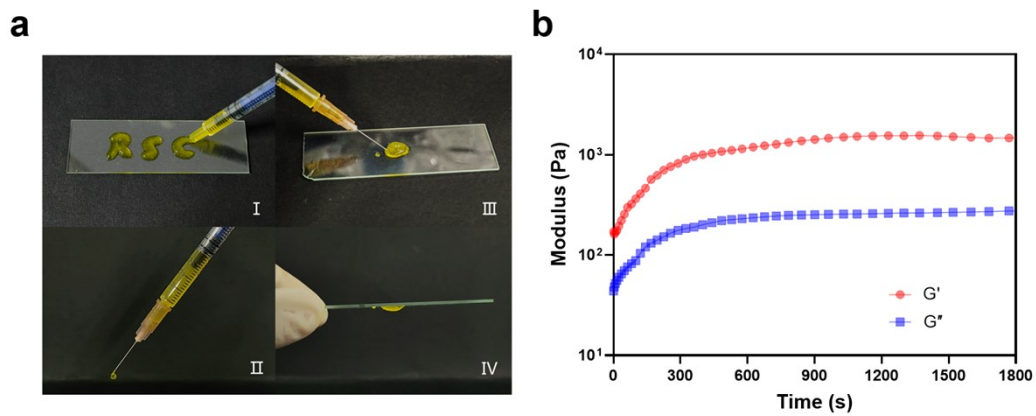

Fig. S8. (a) Representative images of Cur-CNEs/Gel after extrusion or injection. (b) Rheological measurement in dynamic time sweep mode for Cur-CNEs/Gel ( $G'$ : storage modulus,  $G''$ : loss modulus).

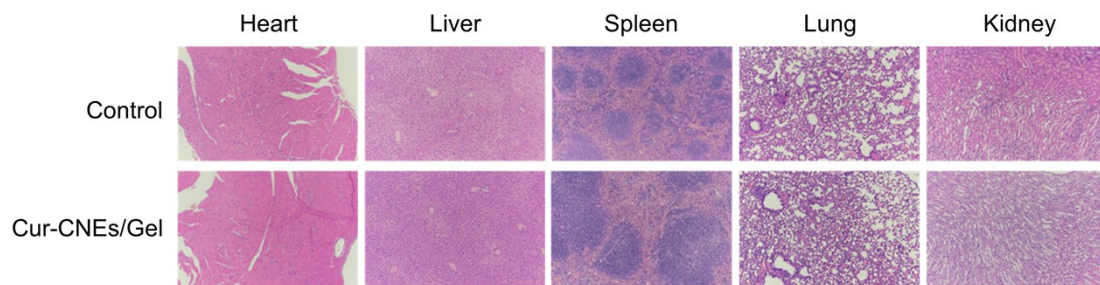

Fig. S9. Images of the H&E-stained normal tissue sections on Day 15 after treatment.

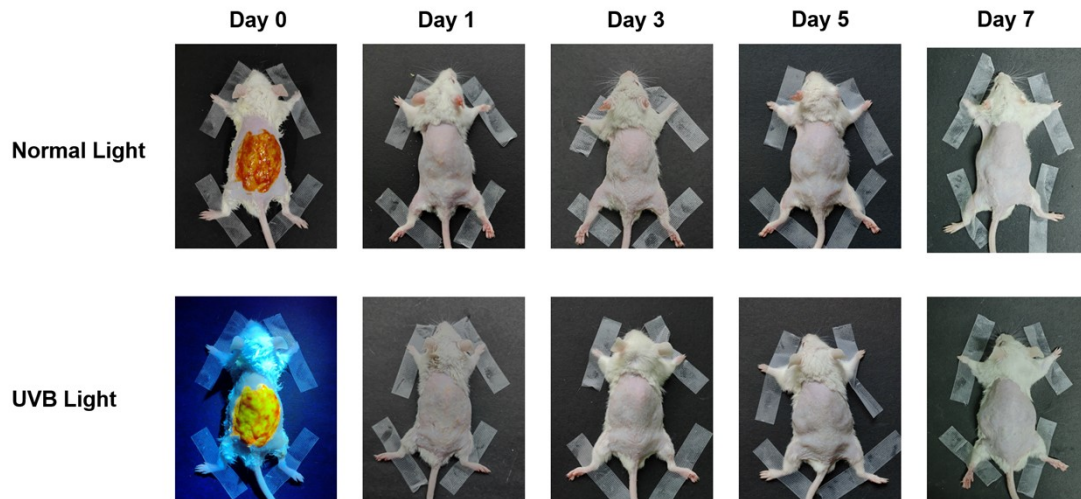

Fig. S10. Skin pictures of mice during 7 days of treatments.
